# Supplementary material
Source: HighWire-hosted journal article supplement (https://bmjopen.bmj.com/content/8/5/e020146)
Supplement: inline-supplementary-material-1 [file inline-supplementary-material-1.pdf]

**Supplementary Table 1. Consolidated criteria for reporting qualitative studies (COREQ): 32-item checklist <sup>11</sup>**

| Topic and Item No.                             | Guide Questions/Description                                                                                                                                     | Reported on Page No.                                                                                                                                                                            |
|------------------------------------------------|-----------------------------------------------------------------------------------------------------------------------------------------------------------------|-------------------------------------------------------------------------------------------------------------------------------------------------------------------------------------------------|
| <b>Domain 1: research team and reflexivity</b> |                                                                                                                                                                 |                                                                                                                                                                                                 |
| Personal Characteristics                       |                                                                                                                                                                 |                                                                                                                                                                                                 |
| 1. Interviewer/facilitator                     | Which author/s conducted the interview or focus group?                                                                                                          | Gina Cleo                                                                                                                                                                                       |
| 2. Credentials                                 | What were the researcher's credentials? E.g. PhD, MD                                                                                                            | Gina Cleo, MNutrDiet (Hons), APD, PhD<br><br>Jolyn Hersch, BLibStud (Hons), MAppSc (Hlth Psych), PhD<br><br>Rae Thomas, Bed, Grad Dip Couns Psych, PhD                                          |
| 3. Occupation                                  | What was their occupation at the time of the study?                                                                                                             | Dietitian, PhD scholar, Teaching fellow                                                                                                                                                         |
| 4. Gender                                      | Was the researcher male or female?                                                                                                                              | Female                                                                                                                                                                                          |
| 5. Experience and training                     | What experience or training did the researcher have?                                                                                                            | The researcher gathered data in face-to-face interviews at Griffith University prior to this study in 2008. She has also worked in clinical practice where in-depth data collection is required |
| Relationship with participants                 |                                                                                                                                                                 |                                                                                                                                                                                                 |
| 6. Relationship established                    | Was a relationship established prior to study commencement?                                                                                                     | GC implemented the weight loss intervention with the participants prior to the qualitative interviews. The interventions ran for 9-12 weeks, 6 months prior to the interviews                   |
| 7. Participant knowledge of the interviewer    | What did the participants know about the researcher? <i>e.g. personal goals, reasons for doing the research</i>                                                 | Participants were provided with an information sheet and consent form which outlined the aim of the study                                                                                       |
| 8. Interviewer characteristics                 | What characteristics were reported about the interviewer/facilitator? <i>e.g. Bias, assumptions, reasons and interests in the research topic</i>                | Participants knew the researcher was a dietitian and PhD scholar with an interest in weight loss maintenance                                                                                    |
| <b>Domain 2: study design</b>                  |                                                                                                                                                                 |                                                                                                                                                                                                 |
| Theoretical framework                          |                                                                                                                                                                 |                                                                                                                                                                                                 |
| 9. Methodological orientation and Theory       | What methodological orientation was stated to underpin the study? <i>e.g. grounded theory, discourse analysis, ethnography, phenomenology, content analysis</i> | Thematic analysis                                                                                                                                                                               |
| Participant selection                          |                                                                                                                                                                 |                                                                                                                                                                                                 |
| 10. Sampling                                   | How were participants selected? <i>e.g. purposive, convenience, consecutive, snowball</i>                                                                       | Purposive maximum variance                                                                                                                                                                      |
| 11. Method of approach                         | How were participants approached? <i>e.g. face-to-face, telephone, mail, email</i>                                                                              | Face-to-face                                                                                                                                                                                    |
| 12. Sample size                                | How many participants were in the study?                                                                                                                        | 16                                                                                                                                                                                              |
| 13. Non-participation                          | How many people refused to participate or dropped out? Reasons?                                                                                                 | 1, due to illness                                                                                                                                                                               |

|                                        |                                                                                                                                          |                                                                                                                                                         |
|----------------------------------------|------------------------------------------------------------------------------------------------------------------------------------------|---------------------------------------------------------------------------------------------------------------------------------------------------------|
| Setting                                |                                                                                                                                          |                                                                                                                                                         |
| 14. Setting of data collection         | Where was the data collected? <i>e.g. home, clinic, workplace</i>                                                                        | Bond University clinic room                                                                                                                             |
| 15. Presence of non-participants       | Was anyone else present besides the participants and researchers?                                                                        | No                                                                                                                                                      |
| 16. Description of sample              | What are the important characteristics of the sample? <i>e.g. demographic data, date</i>                                                 | Gender, age, education level and weight percentage change during the program                                                                            |
| Data collection                        |                                                                                                                                          |                                                                                                                                                         |
| 17. Interview guide                    | Were questions, prompts, guides provided by the authors? Was it pilot tested?                                                            | Yes, participants were asked to reflect on their personal experience of the respective program. The questions were pilot tested amongst work colleagues |
| 18. Repeat interviews                  | Were repeat interviews carried out? If yes, how many?                                                                                    | No                                                                                                                                                      |
| 19. Audio/visual recording             | Did the research use audio or visual recording to collect the data?                                                                      | Data were audio recorded using a digital recorder                                                                                                       |
| 20. Field notes                        | Were field notes made during and/or after the interview or focus group?                                                                  | No                                                                                                                                                      |
| 21. Duration                           | What was the duration of the interviews or focus group?                                                                                  | Ranged between 35-60 minutes                                                                                                                            |
| 22. Data saturation                    | Was data saturation discussed?                                                                                                           | Yes                                                                                                                                                     |
| 23. Transcripts returned               | Were transcripts returned to participants for comment and/or correction?                                                                 | No                                                                                                                                                      |
| <b>Domain 3: analysis and findings</b> |                                                                                                                                          |                                                                                                                                                         |
| Data analysis                          |                                                                                                                                          |                                                                                                                                                         |
| 24. Number of data coders              | How many data coders coded the data?                                                                                                     | 2                                                                                                                                                       |
| 25. Description of the coding tree     | Did authors provide a description of the coding tree?                                                                                    | Yes (S2 Table)                                                                                                                                          |
| 26. Derivation of themes               | Were themes identified in advance or derived from the data?                                                                              | Themes were derived from the data                                                                                                                       |
| 27. Software                           | What software, if applicable, was used to manage the data?                                                                               | Data were transcribed verbatim into Word documents by GC, and grouped by cutting and pasting between documents                                          |
| 28. Participant checking               | Did participants provide feedback on the findings?                                                                                       | No                                                                                                                                                      |
| Reporting                              |                                                                                                                                          |                                                                                                                                                         |
| 29. Quotations presented               | Were participant quotations presented to illustrate the themes / findings? Was each quotation identified? <i>e.g. participant number</i> | Yes                                                                                                                                                     |
| 30. Data and findings consistent       | Was there consistency between the data presented and the findings?                                                                       | Yes                                                                                                                                                     |
| 31. Clarity of major themes            | Were major themes clearly presented in the findings?                                                                                     | Yes                                                                                                                                                     |
| 32. Clarity of minor themes            | Is there a description of diverse cases or discussion of minor themes?                                                                   | Yes                                                                                                                                                     |
