# Supplementary material
Source: HighWire-hosted journal article supplement (https://bmjopen.bmj.com/content/8/5/e020146)
Supplement: inline-supplementary-material-3 [file inline-supplementary-material-3.pdf]

**Supplementary Table 5. Complete list of themes and codes developed from interview data**

| <b>Theme</b>                                 | <b>Codes</b>                                                                                                                                                                                                                                                                                                                                                                                                                                                                |
|----------------------------------------------|-----------------------------------------------------------------------------------------------------------------------------------------------------------------------------------------------------------------------------------------------------------------------------------------------------------------------------------------------------------------------------------------------------------------------------------------------------------------------------|
| <b>Novelty of interventions and outcomes</b> | Novel<br>No hunger<br>No dietary restriction<br>Other diets cause hunger<br>Sense of achievement when tick sheet full<br>Awareness to tick sheet<br>Physically seeing is tangible accountability<br>Dislike fad diets<br>Not restrictive<br>Refreshing<br>Maintenance is point of difference from other programs<br>Booklet is reference point<br>Portion/scales/plates/booklet/tick sheet- physical to see<br>Free will (not forced)<br>Choice                             |
| <b>Convenience and practicality</b>          | Phone call is convenient<br>Practical to implement in daily life<br>Text message is non-obtrusive<br>Text message is convenient<br>Intervention fits into lifestyle and daily habits/routines<br>Practical to implement in daily life<br>Easy tasks<br>Easy change<br>Enjoyable<br>Easy to incorporate into lifestyle<br>Similar to lifestyle<br>Comfortable change<br>Straight forward<br>GC easy to talk to<br>Easy to understand<br>Simple instructions<br>Instructional |
| <b>Indirect health benefits and wellness</b> | Indirect benefits<br>Beneficial to mental health<br>Personally beneficial<br>Encouraged exercise<br>General wellness<br>Improved creativity<br>Increased energy<br>Increased wellbeing<br>Weight loss success<br>Triggered imagination<br>Ripple effect<br>Awareness<br>Enjoyable<br>Mindful<br>Insightful<br>Exciting<br>Triggered imagination<br>Motivated<br>Self-confident<br>Empowered<br>Personal growth<br>Personal<br>Self-efficacy<br>Supportive                   |

|                                     |                                                                                                                                                                                                                                                                                                                                                                                                                                                                                                                                                                                            |
|-------------------------------------|--------------------------------------------------------------------------------------------------------------------------------------------------------------------------------------------------------------------------------------------------------------------------------------------------------------------------------------------------------------------------------------------------------------------------------------------------------------------------------------------------------------------------------------------------------------------------------------------|
|                                     | <p>Increased confidence</p> <p>Confidence to be out of comfort zone</p> <p>Learning curve</p> <p>Anticipation</p>                                                                                                                                                                                                                                                                                                                                                                                                                                                                          |
| <b>Accountability</b>               | <p>Responsibility to GC</p> <p>Accountability to study</p> <p>Accountability to/through tick sheet</p> <p>Accountability to tips</p> <p>Meaningful accountability</p> <p>Enjoyed accountability</p> <p>Accountability to GC</p> <p>Fear of judgment (not losing weight)</p>                                                                                                                                                                                                                                                                                                                |
| <b>Sustainable behaviour change</b> | <p>Change of habits</p> <p>Change of focus</p> <p>Lifestyle change</p> <p>Habits through repetition</p> <p>Lifestyle program</p> <p>Holistic approach</p> <p>Set focus</p> <p>Changed mindset</p> <p>Changed attitude</p> <p>Behavioural change</p> <p>Initial stages are challenging</p> <p>Uncomfortable to start</p> <p>Changing habits is challenging</p> <p>Manageable long term</p> <p>Progressively easier</p> <p>Long-term change</p> <p>Changing routines</p> <p>Sustained weight loss</p> <p>Sustained benefits</p> <p>Sustained awareness</p> <p>Sustained behaviour change</p> |
