# Supplementary material
Source: HighWire-hosted journal article supplement (https://bmjopen.bmj.com/content/8/5/e020146)
Supplement: inline-supplementary-material-4 [file inline-supplementary-material-4.pdf]

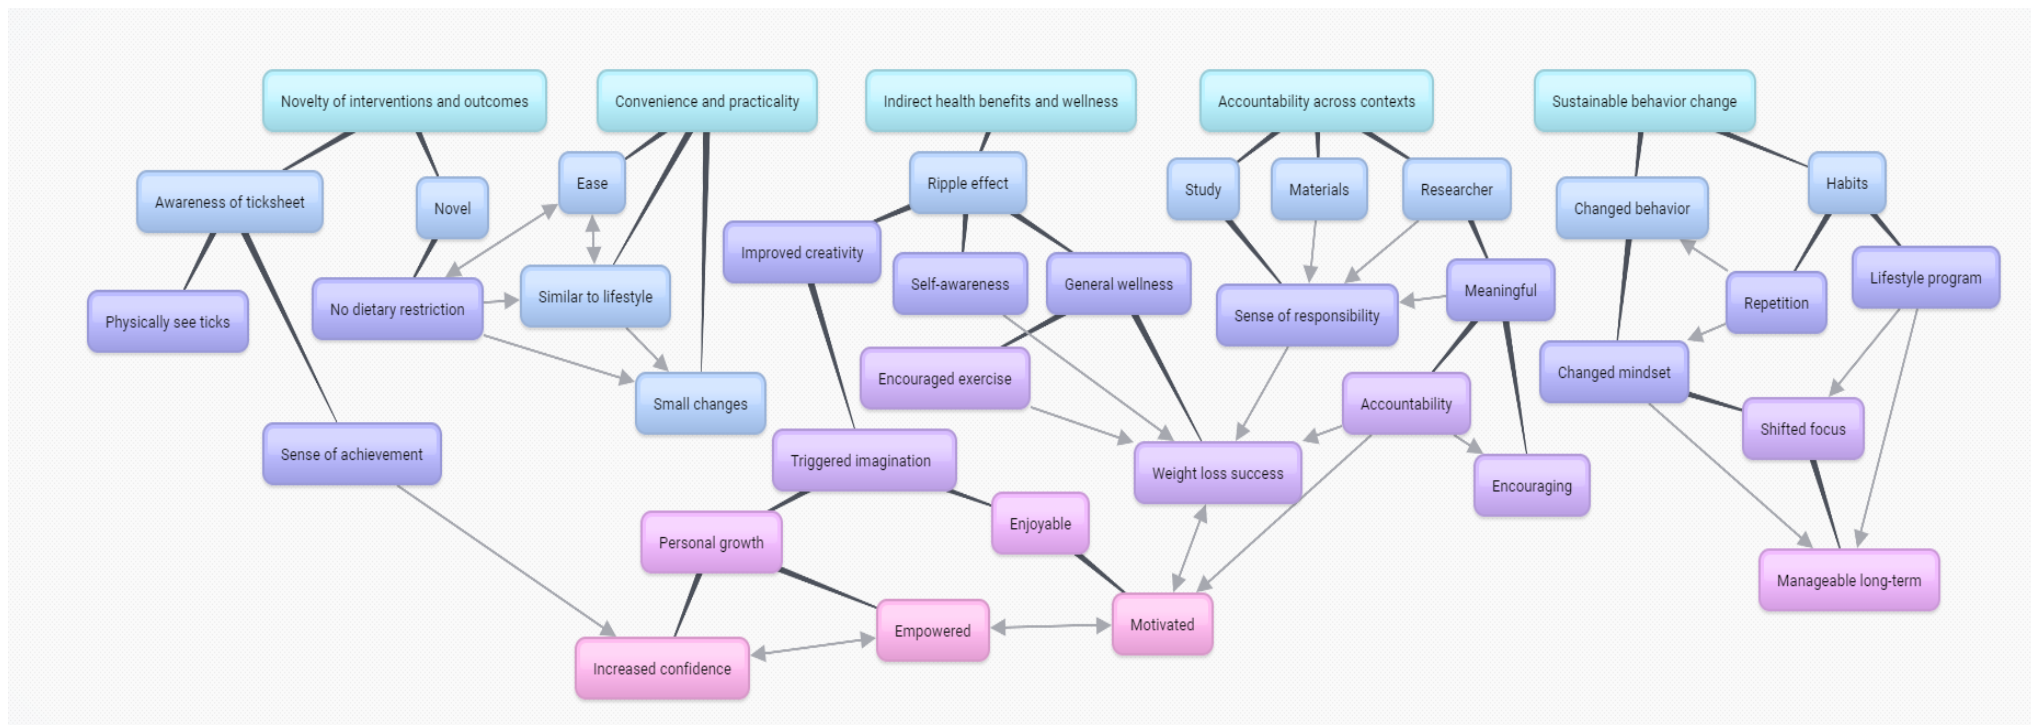

Supplementary Figure 1 Conceptual map of themes and codes developed from interview data
