# Supplementary material
Source: HighWire-hosted journal article supplement (https://bmjopen.bmj.com/content/8/5/e020146)
Supplement: inline-supplementary-material-6 [file inline-supplementary-material-6.pdf]

**Supplementary Table 3. Mean value of participant characteristics per intervention**

| Program | Gender<br>m/f | Age, years<br>(SD) | Education level                                                        | % Weight change during<br>program (SD) |
|---------|---------------|--------------------|------------------------------------------------------------------------|----------------------------------------|
| TTT     | 4/3           | 53 (10.6)          | 1 Did not complete school<br>2 Completed school<br>4 University degree | -5.3% (4.8%)                           |
| DSD     | 4/4           | 53.5 (9.9)         | 0 Did not complete school<br>5 Completed school<br>3 University degree | -4.1% (2.9%)                           |

Abbreviations: TTT = Ten Top Tips; DSD = Do Something Different; m/f = male / female
