# Supplementary material
Source: HighWire-hosted journal article supplement (https://bmjopen.bmj.com/content/8/5/e020146)
Supplement: inline-supplementary-material-7 [file inline-supplementary-material-7.pdf]

**Supplementary Table 4. Characteristics of participant sample**

| Attribute              |                         | <i>n</i> = 15 |
|------------------------|-------------------------|---------------|
| Gender                 | Male                    | 8             |
|                        | Female                  | 7             |
| Age                    | 35-44 yrs               | 4             |
|                        | 45-54 yrs               | 3             |
|                        | 55-64 yrs               | 6             |
|                        | 65+ yrs                 | 2             |
| Education level        | Did not complete school | 1             |
|                        | Completed school        | 7             |
|                        | University degree       | 7             |
| Weight lost on program | Gained weight           | 1             |
|                        | 0-3 kg                  | 6             |
|                        | 4-7 kg                  | 5             |
|                        | 8-11 kg                 | 2             |
|                        | 12-15 kg                | 1             |

Abbreviations: yrs = years; kg = kilograms
